# Supplementary material
Source: PubMed Central journal article supplement (PMC5708263)
Supplement: mz7b00723_si_001.pdf [file mz7b00723_si_001.pdf]

## Supplementary Information

### **Morphology Under Control: Engineering Biodegradable Stomatocytes**

Imke A.B. Pijpers<sup>‡</sup>, Loai K.E.A. Abdelmohsen<sup>‡</sup>, David S. Williams<sup>\*†§</sup> and Jan C.M. van Hest<sup>\*†</sup>

<sup>†</sup>Eindhoven University of Technology, P.O. Box 513 (STO 3.31), 5600MB Eindhoven, The Netherlands

<sup>§</sup>Department of Chemistry, Swansea University, Swansea SA2 8PP, United Kingdom

[<sup>‡</sup> *Authors contributed equally to this work*]

*\*Address correspondence to: j.c.m.v.hest@tue.nl (J.C.M.v.H.), d.s.williams@swansea.ac.uk (D.S.W.)*

### **Experimental Materials and Methods**

#### *Materials*

All chemicals were used as received unless otherwise stated. For the synthesis of poly(ethylene glycol)-*b*-poly(D,L-lactide) (PEG-PDLLA), Poly(ethylene glycol) 1K and 2K were purchased from JenKem technology and freeze-dried before use. D,L-lactide was purchased from Acros and used as supplied. All other chemicals were supplied by Sigma-Aldrich and were used without any purification. Ultra pure MilliQ water obtained from Merck Millipore Q-Pod system (18.2 MΩ) with a 0.22 μm Millipore® Express 40 filter was used for the polymersome self-assembly and their dialysis. Dialysis Membranes MWCO 12-14000 g mol<sup>-1</sup> Spectra/Por® were used for dialysis during the stomatocyte formation. Sodium chloride was purchased from Merck.

#### *Methods*

**Nuclear Magnetic Resonance (NMR):** Proton nuclear magnetic resonance measurements were performed on a Bruker 400 Ultrashield™ spectrometer equipped with a Bruker SampleCase autosampler, using CDCl<sub>3</sub> as a solvent and TMS as internal standard.

**Gel permeation chromatography (GPC):** GPC was conducted using a Shimadzu Prominence-*i* GPC system with a PL gel 5 μm mixed D and mixed C column (Polymer Laboratories) with PS standard and equipped with a Shimadzu RID-20A differential refractive index detector and THF used as an eluent with a flow rate of 1 mL min<sup>-1</sup>.

**Differential scanning calorimetry (DSC):** DSC measurements were performed using TA Instruments Multicell DSC.

**Dynamic Light Scattering (DLS):** DLS measurements were performed on a Malvern instrument Zetasizer (model Nano ZSP) equipped with an autosampler. Zetasizer software was used to process and analyse the data.

**Cryogenic transmission electron microscopy (cryo-TEM):** Experiments were performed using a FEI Tecnai G2 Sphere (200 kV electron source) equipped with LaB<sub>6</sub> filament utilizing a cryoholder or a FEI Titan (300 kV electron source) equipped with autoloader station. Samples for cryo-TEM were prepared by treating the grids (Lacey carbon coated, R2/2, Cu, 200 mesh, EM sciences) in a Cressington 208 carbon coater for 40 seconds. Then, 3 μl of the polymersome solution was pipetted on the grid and blotted in a Vitrobot MARK III at 100% humidity. The grid was blotted for 3 seconds (offset -3) and directly plunged and frozen in liquid ethane. Processing of TEM images was performed

with ImageJ, a program developed by NIH and available as public domain software at <http://rsbweb.nih.gov/ij/>.

**Asymmetric Flow Field-Flow Fractionation and multi-angle light scattering (AF4-MALS):** The asymmetric flow field-flow fractionation – UV – Quels (AF4-UV-Quels) experiments were performed on a Wyatt Dualtec AF4 instrument connected to a Shimadzu LC-2030 Prominence-*i* system with Shimadzu LC-2030 autosampler. The AF4 was connected to a Wyatt DAWN HELEOS II light scattering detector (MALS) installed at different angles (12.9 °, 20.6 °, 29.6 °, 37.4 °, 44.8 °, 53.0 °, 61.1 °, 70.1 °, 80.1 °, 90.0 °, 99.9 °, 109.9 °, 120.1 °, 130.5 °, 149.1 °, and 157.8 °) using a laser operating at 664.5 nm and a Wyatt Optilab Rex refractive index detector. Detectors were normalized using Bovine Serum Albumin (BSA). The processing and analysis of the LS data and radius of gyration ( $R_G$ ) calculations were performed on Astra 7 software (using the Berry model, which is recommended for particles of size > 50 nm). All AF4 fractionations were performed on an AF4 short channel with regenerated cellulose (RC) 10 KDa membrane (Millipore) and spacer of 350  $\mu\text{m}$ .

## Experimental Procedures

**Ring opening polymerization (ROP) of poly(ethylene)glycol-poly(D,L-lactide) PEG-PDLLA block copolymers:** PEG<sub>n</sub>-PDLLA<sub>m</sub> was synthesized by ring opening polymerization starting from PEG-macro initiators and using DBU as a catalyst as described previously<sup>1</sup> yielding PEG<sub>n</sub>-PDLLA<sub>m</sub> polymers with 80 % yield. Copolymer composition was calculated by comparing the protons of PEG (3.65-3.7 ppm) and its terminal methyl unit (singlet at 3.37 ppm) to PDLLA CH (multiplet at 1.4-1.8 and 5.11-5.28 ppm). All PDI values were calculated to be less than 1.2 using PS standards for calibration. Differential Scanning Calorimetry measurements were performed to determine glass transition temperatures ( $T_g$ ) by scanning from -20 °C to 60 °C at a rate of 0.5 °C/min. and 3 heating/cooling steps. The average polymer compositions and values for PDI and  $T_g$  are given in Table S1.

**Preparation of polymersomes:** In a 15 mL vial, PEG<sub>22</sub>-PDLLA<sub>95</sub> and PEG<sub>44</sub>-PDLLA<sub>95</sub> block copolymers (1:1 w/w, 20 mg) were dissolved in 2 mL of THF and dioxane (1:4 v/v) and the vial was sealed with a rubber septum. The solution was stirred at 700 rpm for a minimum of 30 minutes prior to the addition of MilliQ (2 mL, 1 mL h<sup>-1</sup>) *via* a syringe pump. A needle was inserted into the septum to release pressure. The resulted cloudy suspension was transferred into a prehydrated dialysis bag (SpectraPor, MWCO: 12-14 kDa, 2 mL/cm). Dialysis was performed against MilliQ at room temperature for max. 24 hours with a water change after 1 hour.

**Preparation of discs:** Polymersomes were prepared according to the abovementioned procedure. Afterwards, dialysis was performed against MilliQ at 5 °C for max. 24 hours with a water change after 1 hour.

**General method for stomatocytes preparation:** First, a batch of polymersomes was prepared following the previously mentioned procedure. Polymersomes were dialyzed against pre-cooled salt solution (50 mM NaCl, unless stated otherwise) at 5 °C for max. 24 hours.

**Reverse engineering of stomatocytes into polymersomes:** Stomatocytes were prepared according to above described procedure. Stomatocytes were transferred into a prehydrated dialysis bag. Stomatocytes were dialyzed against 50 vol % organic solvent (THF/dioxane (1:4)). Aliquots of 250  $\mu\text{L}$  were withdrawn every hour and quenched with water to a total volume of 2 mL. Samples were directly used for cryo-TEM imaging and DLS.

## Supplementary Figures and Tables

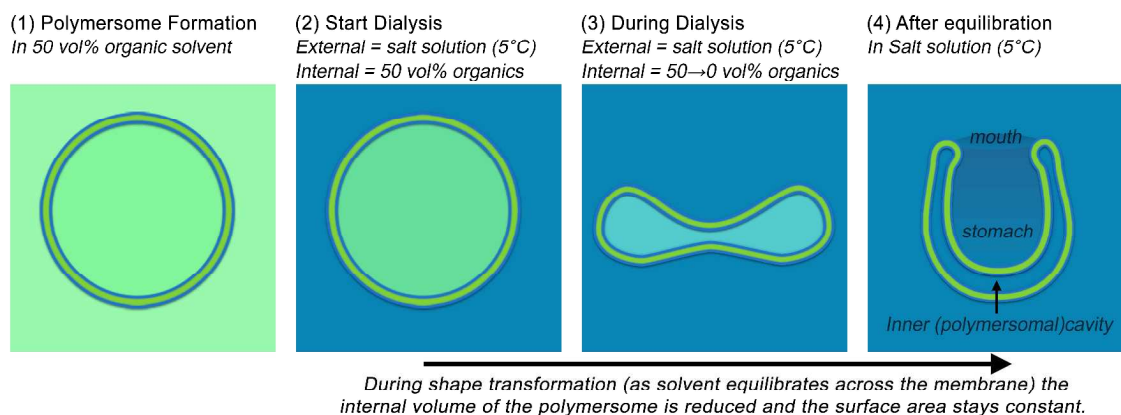

**Figure S1:** Description of the shape transformation process utilized in this work, whereby polymersomes (having been fabricated in 50 vol% of organic solvent) are dialyzed against salt solution at 5 °C. During the early stages of dialysis, as organic solvent re-equilibrates across the polymersomal membrane, shape transformation occurs as a result of osmotically-induced volume reduction and consequent folding of the membrane. The color scheme here is intended to highlight the solvent composition inside and outside of the polymersome *inner* cavity during this process. Shape transformation of spherical into bowl-shaped (stomatocytes) polymersomes proceeds *via* an oblate pathway as a result of induced *negative*  $C_0$ .<sup>2</sup>

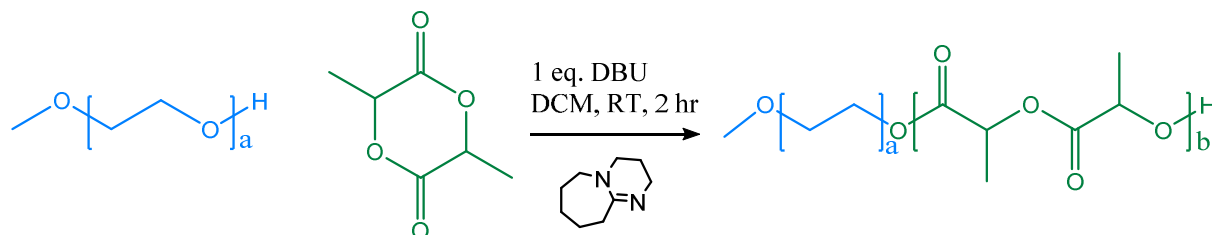

**Figure S2:** Organocatalyzed synthesis of block copolymer PEG<sub>a</sub>-PDLLA<sub>b</sub> with a=22/44 and b=45/70/95/120.

| Polymer                                 | Average polymer composition ( <sup>1</sup> H-NMR) | PDI (GPC) | T <sub>g</sub> (DSC) |
|-----------------------------------------|---------------------------------------------------|-----------|----------------------|
| PEG <sub>22</sub> -PDLLA <sub>95</sub>  | PEG <sub>22</sub> -PDLLA <sub>98</sub>            | 1.17      | 29 °C                |
| PEG <sub>44</sub> -PDLLA <sub>95</sub>  | PEG <sub>44</sub> -PDLLA <sub>95</sub>            | 1.11      | 26 °C                |
| PEG <sub>22</sub> -PDLLA <sub>70</sub>  | PEG <sub>22</sub> -PDLLA <sub>72</sub>            | 1.09      | 32 °C                |
| PEG <sub>44</sub> -PDLLA <sub>70</sub>  | PEG <sub>44</sub> -PDLLA <sub>68</sub>            | 1.15      | 36 °C                |
| PEG <sub>22</sub> -PDLLA <sub>120</sub> | PEG <sub>22</sub> -PDLLA <sub>125</sub>           | 1.06      | 35 °C                |
| PEG <sub>44</sub> -PDLLA <sub>120</sub> | PEG <sub>44</sub> -PDLLA <sub>121</sub>           | 1.07      | 21 °C                |

**Table S1:** Characterization of PEG<sub>a</sub>-PDLLA<sub>b</sub> block copolymers.

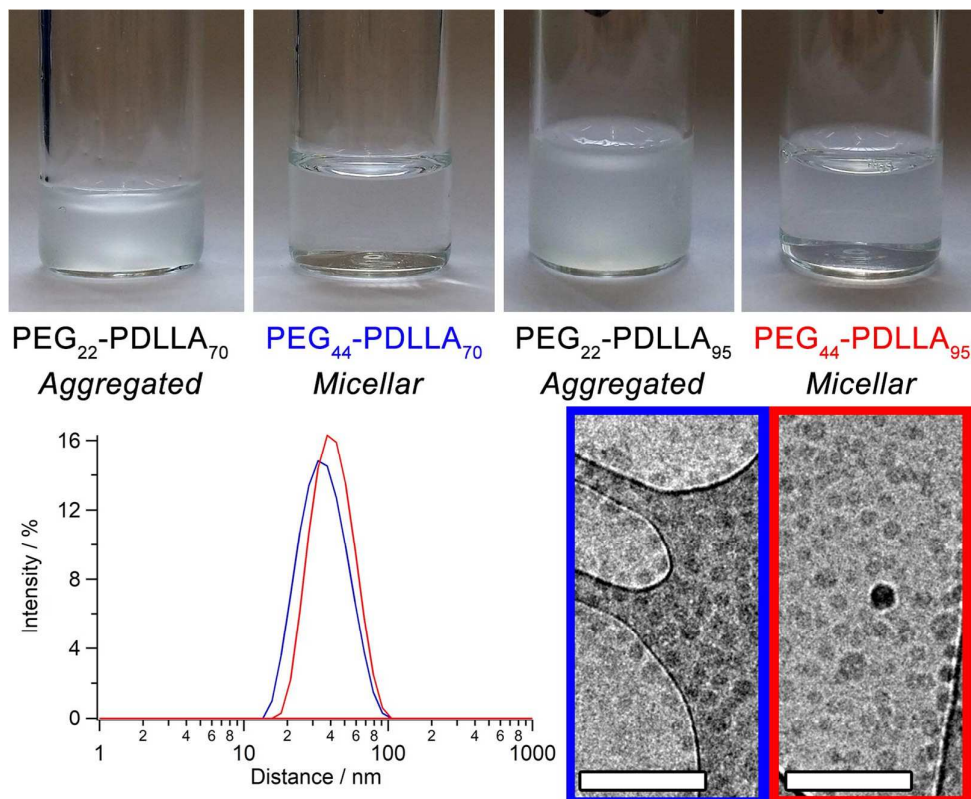

**Figure S3:** (Top) Photographs showing the outcome of the self-assembly of PDLLA<sub>70</sub> and PDLLA<sub>95</sub> based copolymers. (Bottom) DLS intensity profile and cryo-TEM images confirming micelles formation from PEG<sub>44</sub>-PDLLA<sub>70</sub> (blue) and PEG<sub>44</sub>-PDLLA<sub>95</sub> (red) with average hydrodynamic diameters ( $D_h$ ) of 39 and 47 nm, respectively. Scale bars correspond to 200 nm.

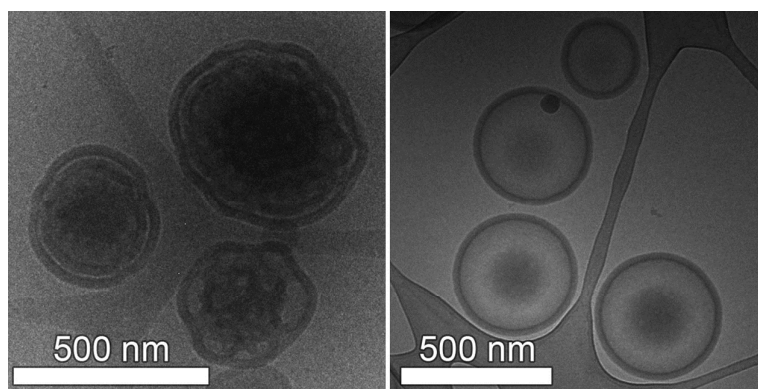

**Figure S4:** Cryo-TEM images of blended PEG<sub>22/44</sub>-PDLLA<sub>120</sub> and non-blended PEG<sub>44</sub>-PDLLA<sub>120</sub> prepared via dialysis against 50 mM NaCl at 5 °C, displaying sponge-phase particles (left) and polymersomes (right).

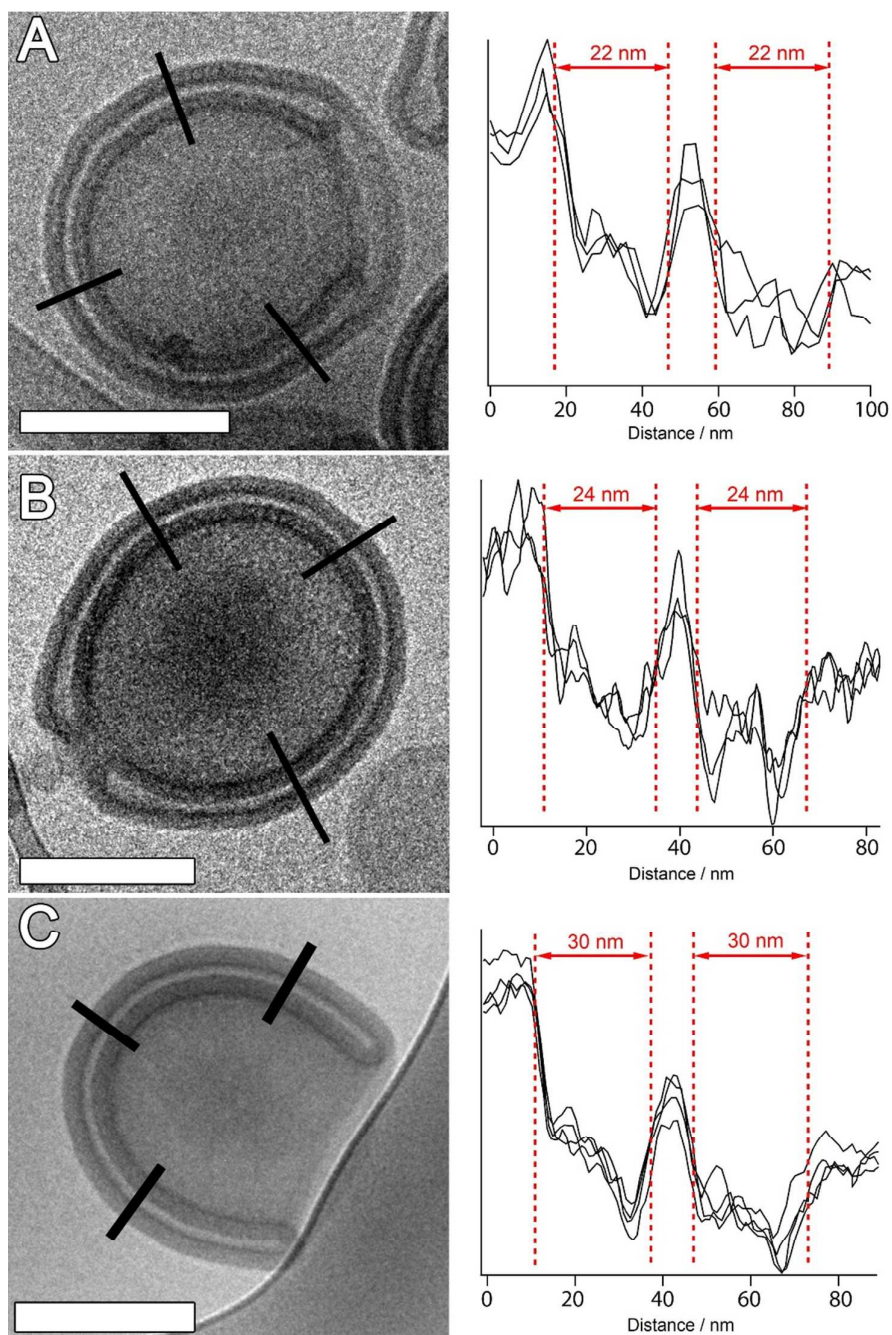

**Figure S5:** Cryo-TEM images of stomatocytes with varying membrane thickness and corresponding line profile: (A) PEG<sub>22/44</sub>-PDLLA<sub>70</sub> stomatocytes, (B) PEG<sub>22/44</sub>-PDLLA<sub>95</sub> stomatocytes and (C) PEG<sub>22/44</sub>-PDLLA<sub>120</sub> sponge-phase particles. All scale bars correspond to 200 nm.

A) Pre-Dialysis

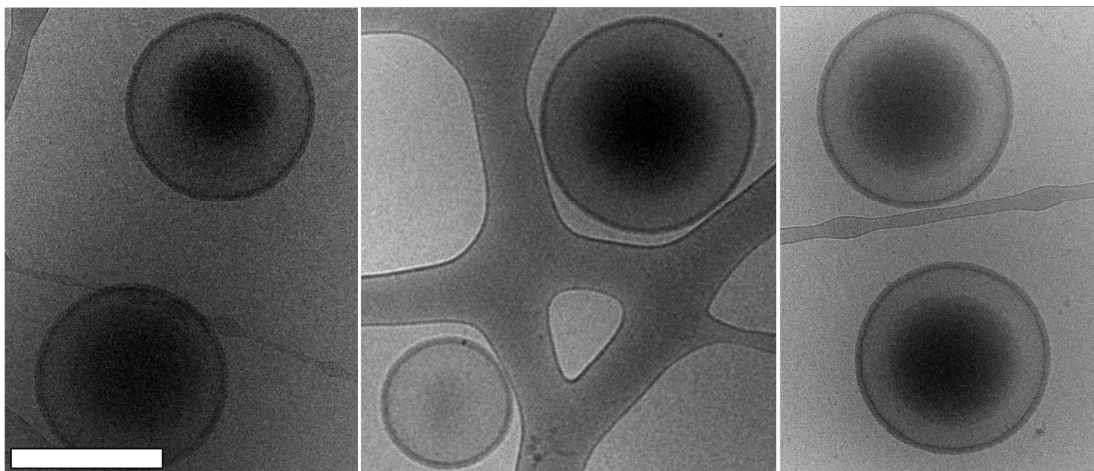

B) 0 mM NaCl

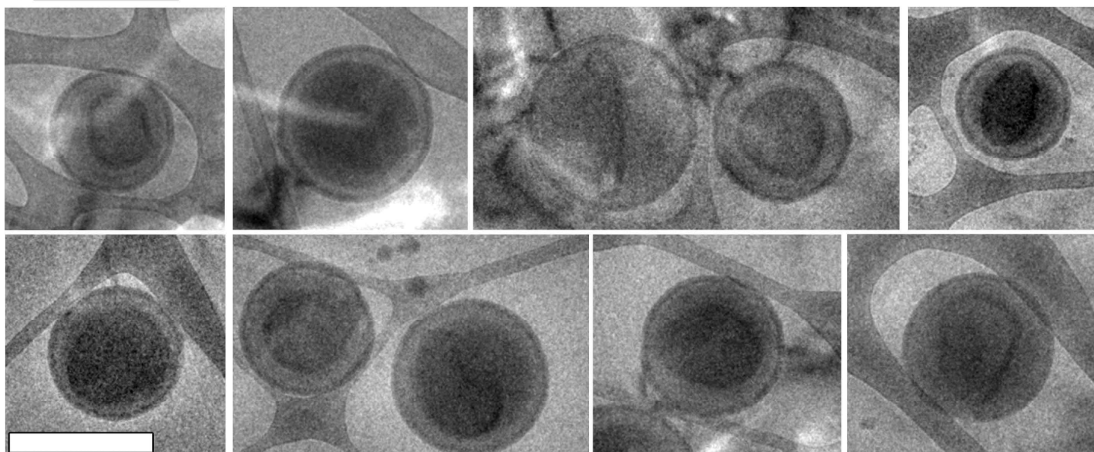

C) 10 mM NaCl

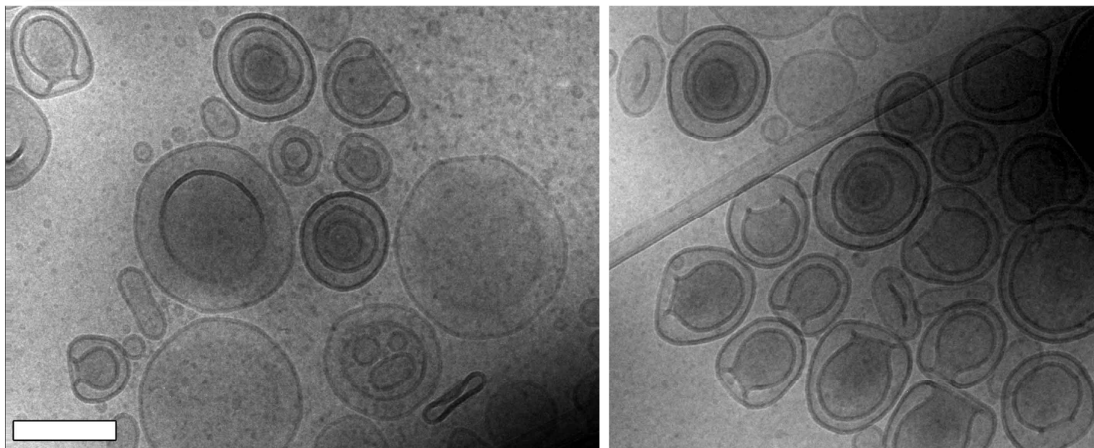

**Figure S6: Cryo-TEM images of a) PEG<sub>22/44</sub>-PDLLA<sub>95</sub> polymersomes before dialysis. Shape transformation of polymersomes (A) after dialysis against MilliQ at 5 °C (B) and against 10 mM NaCl (C) at 5 °C. All scale bars correspond to 500 nm.**

A) 50 mM NaCl

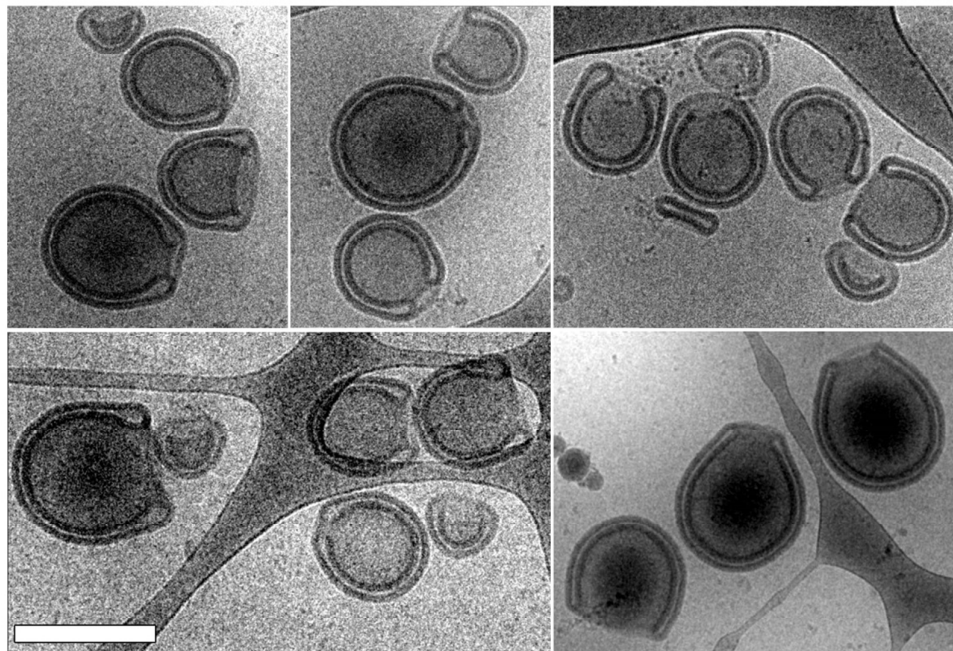

B) 100 mM NaCl

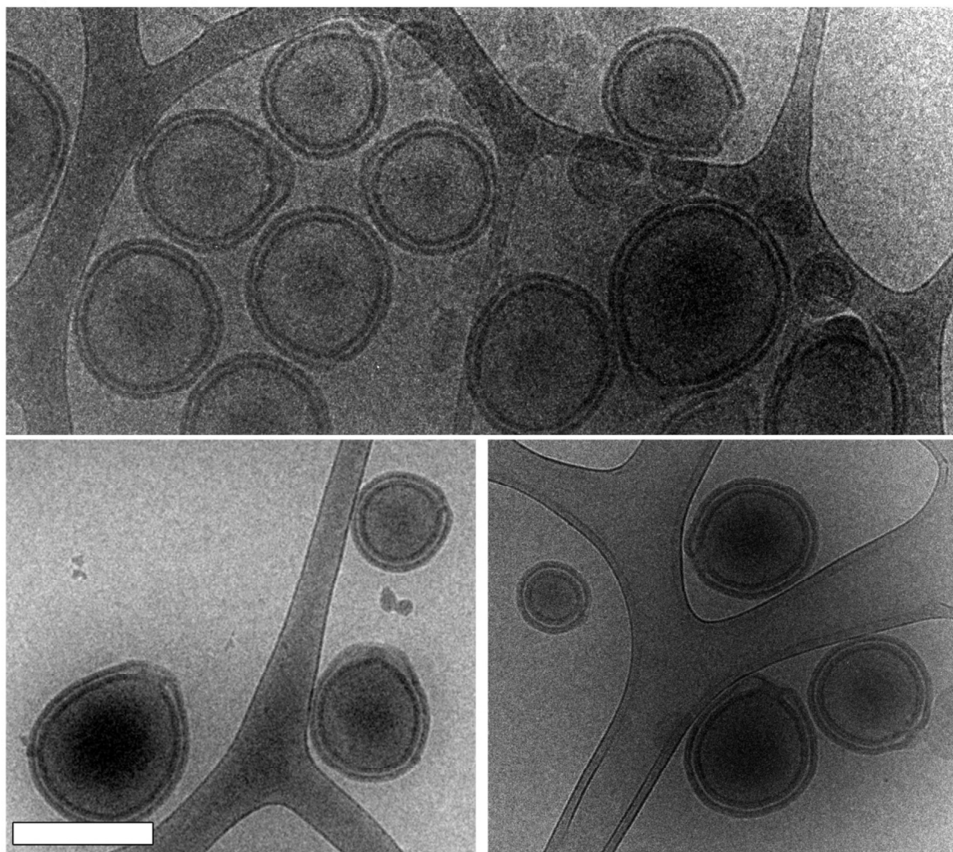

**Figure S7:** Cryo-TEM images of stomatocytes prepared from PEG<sub>22/44</sub>-PDLLA<sub>95</sub> obtained *via* dialysis against 50 mM NaCl (A) and 100 mM NaCl (B) at 5 °C. Please note decreasing neck size at higher salt concentrations. All scale bars correspond to 500 nm.

A) 0 min

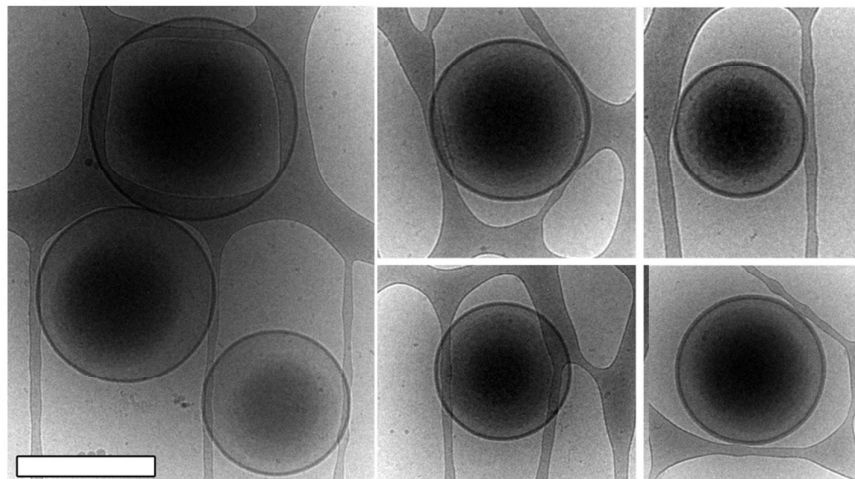

B) 5 min

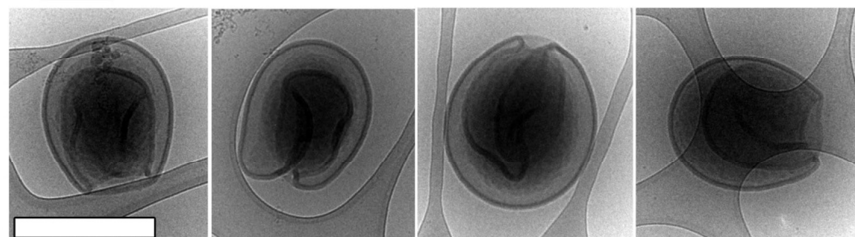

C) 15 min

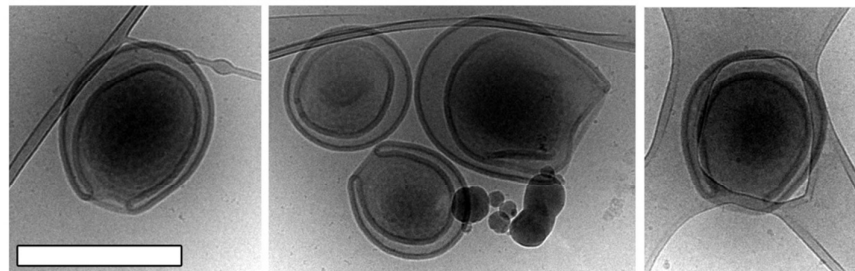

D) 30 min

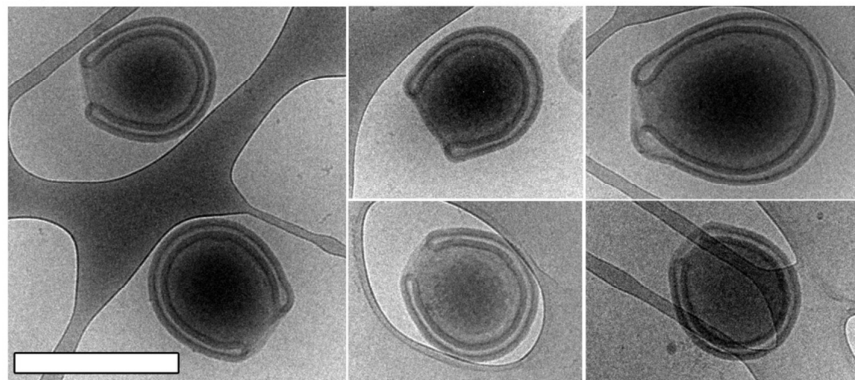

**Figure S8:** Cryo-TEM images of the shape transformation of polymersomes towards stomatocytes at different time intervals. Stomatocytes were obtained via dialysis of polymersomes of PEG<sub>22/44</sub>-PDLLA<sub>95</sub> against 50 mM NaCl at 5 °C. All scale bars correspond to 500 nm.



| Start (min) | End (min) | Mode             | Cross flow start (mL min <sup>-1</sup> ) | Cross flow end (mL min <sup>-1</sup> ) |
|-------------|-----------|------------------|------------------------------------------|----------------------------------------|
| 0           | 2         | Elution          | 0.20                                     | 0.20                                   |
| 2           | 3         | Focus            | -                                        | -                                      |
| 3           | 5         | Focus + inject   | -                                        | -                                      |
| 5           | 6         | Focus            | -                                        | -                                      |
| 6           | 36        | Elution          | 0.20                                     | 0.10                                   |
| 36          | 43        | Elution          | 0.10                                     | 0.00                                   |
| 43          | 44        | Elution          | 0.00                                     | 0.00                                   |
| 44          | 45        | Elution + inject | 0.00                                     | 0.00                                   |
| 45          | 50        | Elution          | 0.00                                     | 0.00                                   |

**Table S2: General method for AF4 fractionation.** 20  $\mu\text{L}$  Aliquots of polymersome samples were injected into the AF4 short channel and the conditions were programmed as follows: detector flow (1.5 mL min<sup>-1</sup>), focus flow (0.70 mL min<sup>-1</sup>) and injection flow (0.2 mL min<sup>-1</sup>)

A) 1 hr

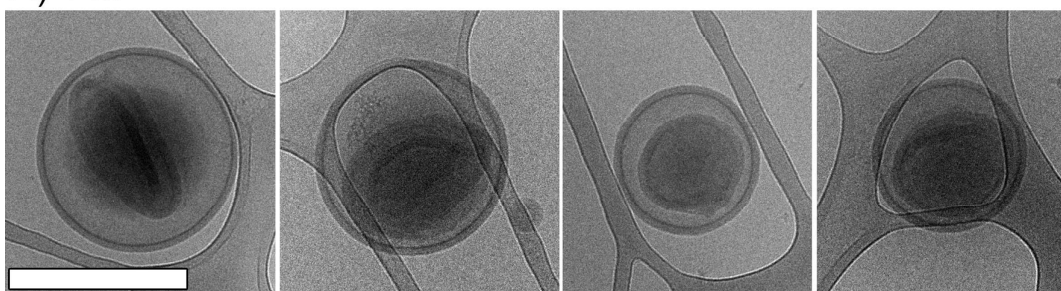

B) 2.5 hr

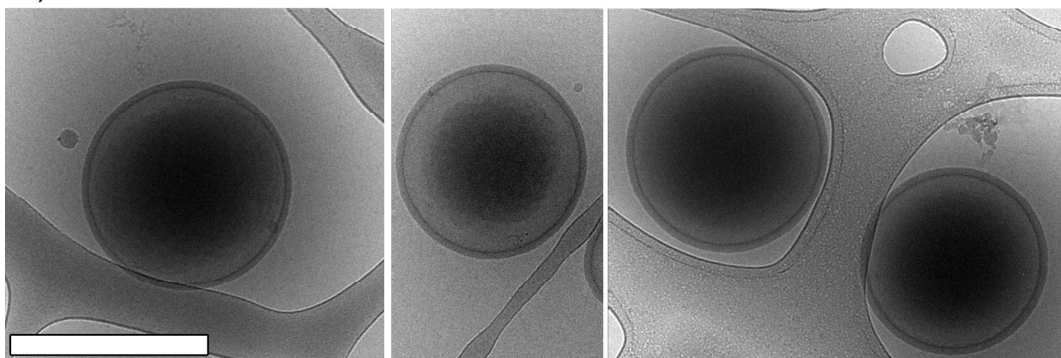

**Figure S9:** Cryo-TEM images tracking the reverse dialysis process as stomatocytes are reverse engineered to spherical polymersomes after dialysis against 50 vol% organic solvent. All scale bars correspond to 500 nm.

## References

1. Abdelmohsen, L. K. E. A. *et al.* Formation of Well-Defined, Functional Nanotubes via Osmotically Induced Shape Transformation of Biodegradable Polymersomes. *J. Am. Chem. Soc.* **138**, 9353–9356 (2016).
2. Rikken, R. S. M. *et al.* Shaping Polymersomes into Predictable Morphologies via Out-of-Equilibrium Self-assembly. *Nat. Commun.* **7**, (2016)
